# Supplementary material for: Persistent HBV replication and serological response during up to fifteen years of tenofovir-based antiretroviral therapy in HIV-hepatitis B coinfected patients: a multicenter prospective cohort study
Source: bioRxiv or medRxiv preprint supplement (doi:10.1101/2021.07.01.21259560), 2021-07-06

Supplementary Figure S1. Patient flow

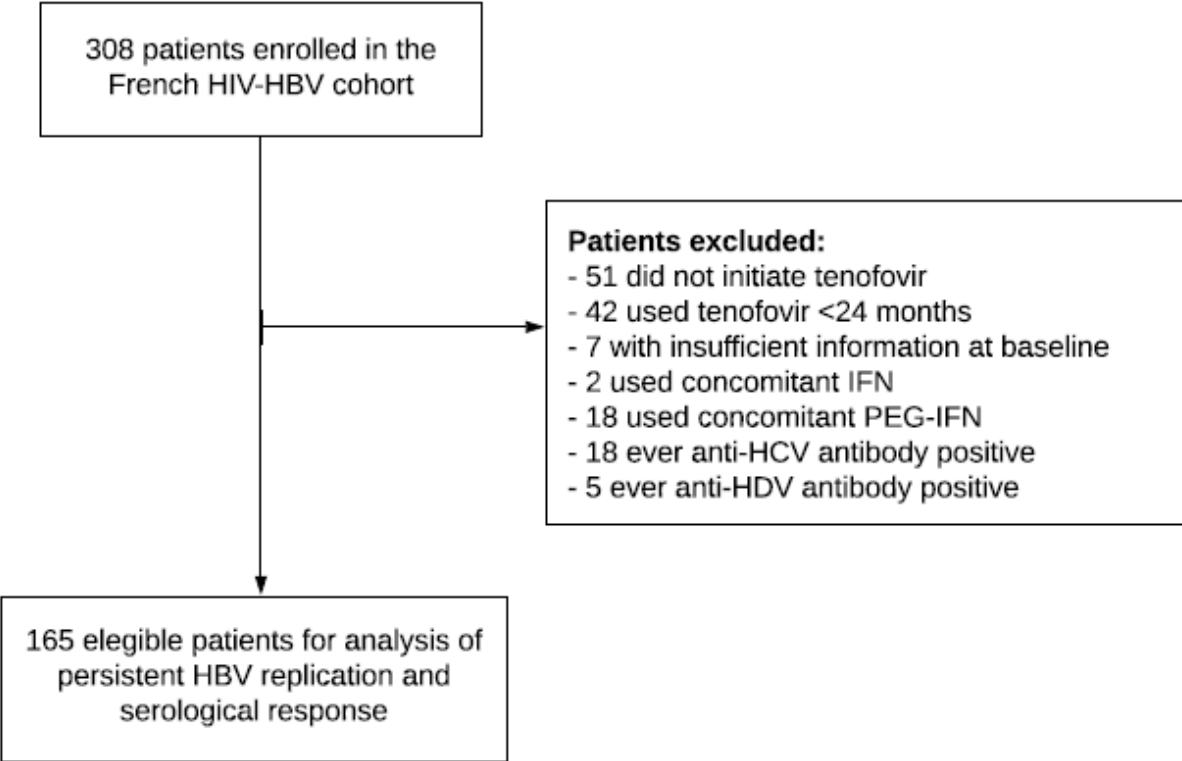

Supplement: Supplementary file [file media-1.pdf]
